# Supplementary material for: An automated preloaded pipet tip SPE method for the accurate quantification of carcinogenic polycyclic aromatic hydrocarbons from tea
Source: Royal Society of Chemistry journal article supplement (doi:10.1039/d0ay00238k), 2020-01-01
Supplement: d0ay00238k1.pdf [file d0ay00238k1.pdf]

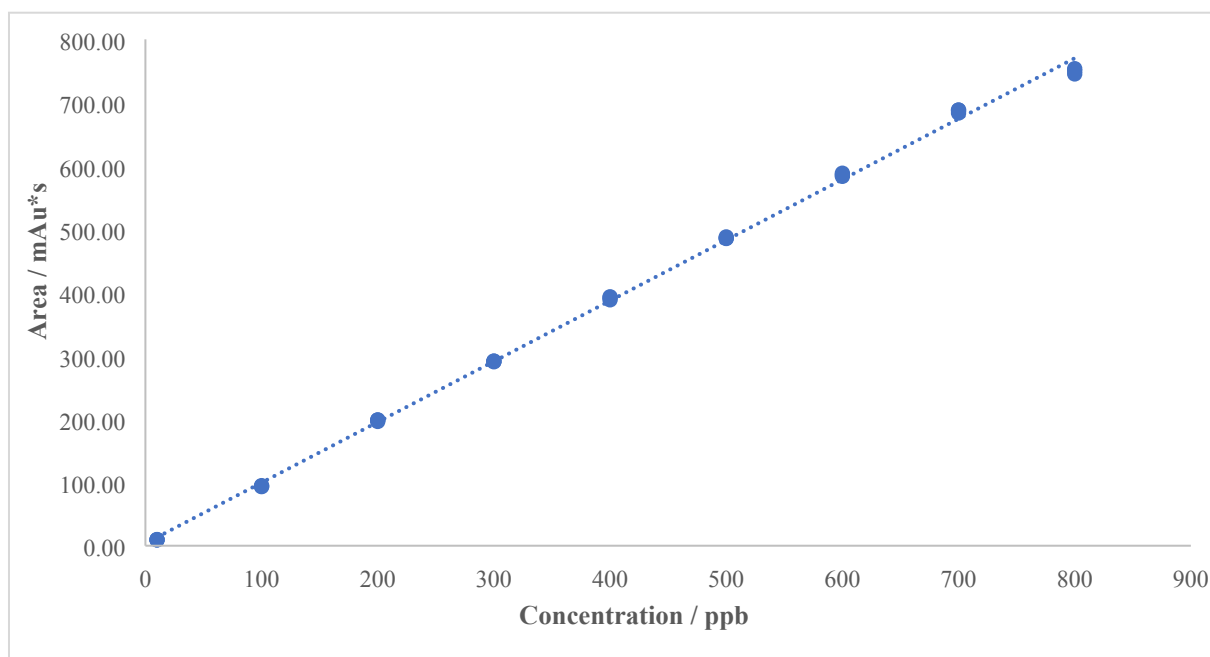

Figure S 1 Calibration Curve Benzo[a]pyrene

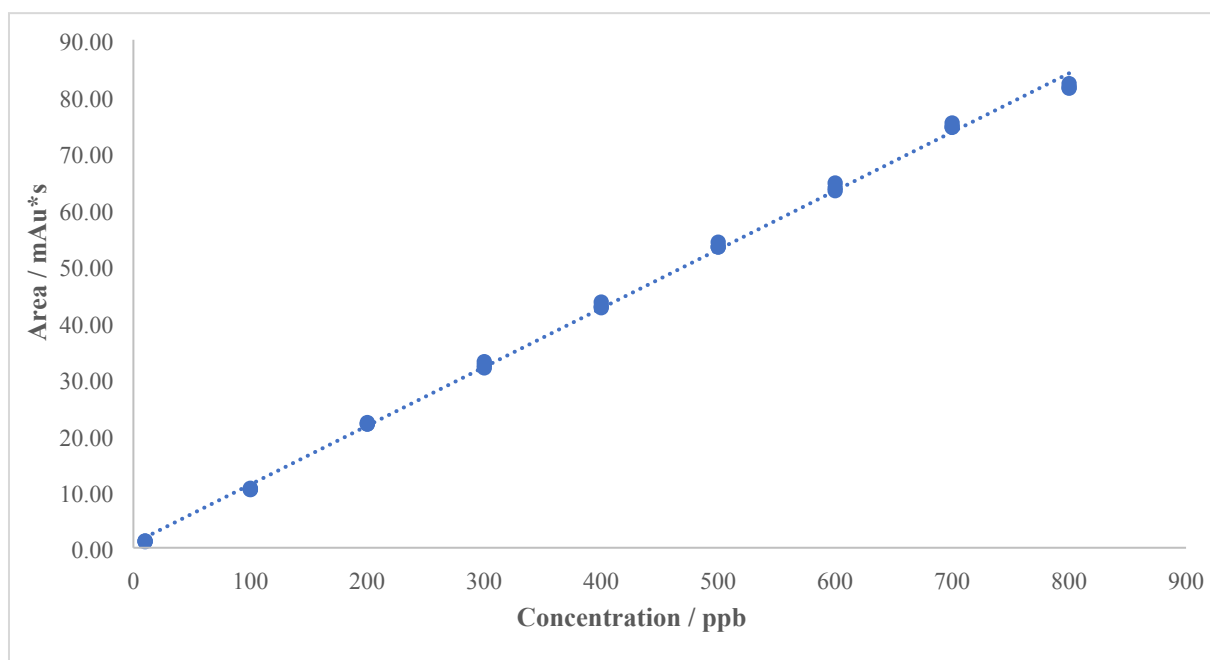

Figure S 2 Calibration Curve Chrysene

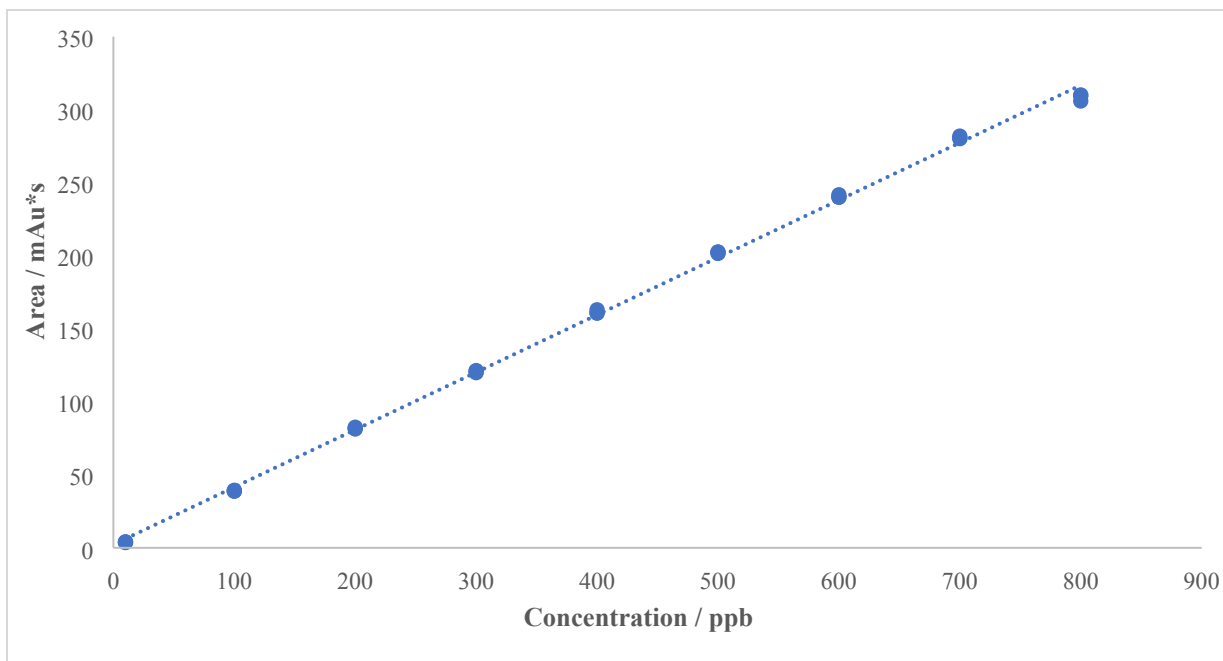

Figure S 3 Calibration Curve Benzo[a]anthracene

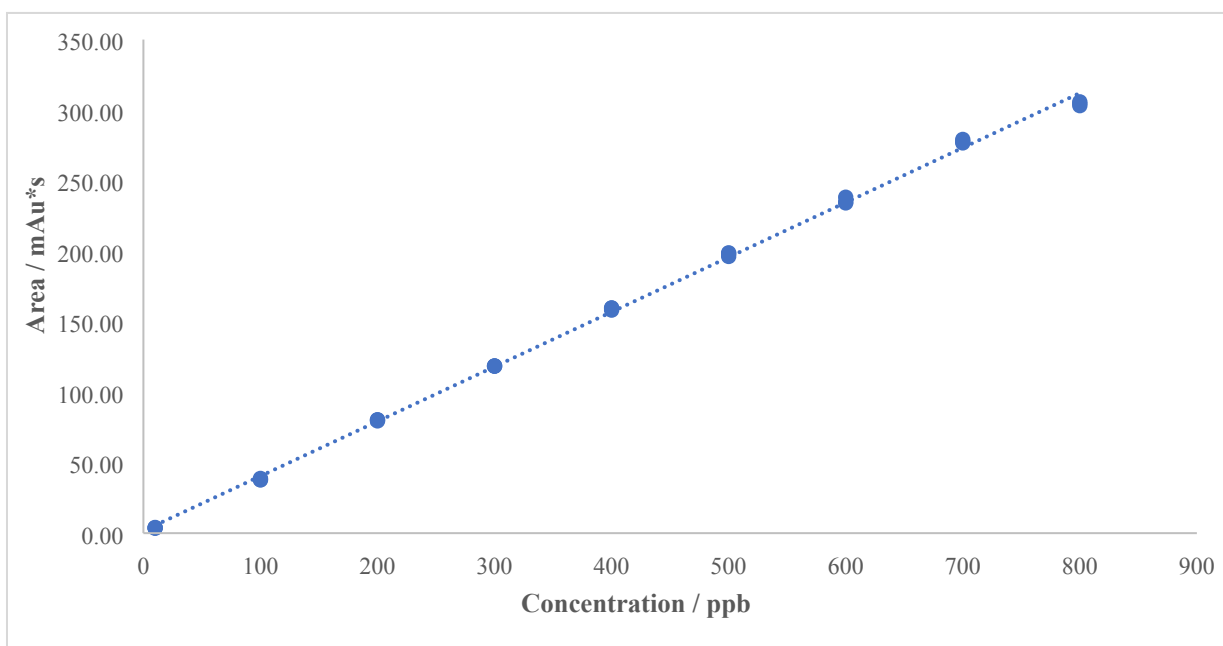

Figure S 4 Calibration Curve Benzo[b]fluoranthene

| Benzo[a]pyrene |     |              | Chrysene |     |              | Benzo[a]anthracene |     |              | Benzo[b]fluoranthene |     |              |
|----------------|-----|--------------|----------|-----|--------------|--------------------|-----|--------------|----------------------|-----|--------------|
| Repeat         | PPB | Area / mAu*s | Repeat   | PPB | Area / mAu*s | Repeat             | PPB | Area / mAu*s | Repeat               | PPB | Area / mAu*s |
| 1              | 10  | 9,75         | 1        | 10  | 1,08         | 1                  | 10  | 3,85         | 1                    | 10  | 3,81         |
| 1              | 100 | 93,41        | 1        | 100 | 10,30        | 1                  | 100 | 39,39        | 1                    | 100 | 37,70        |
| 1              | 200 | 198,46       | 1        | 200 | 22,18        | 1                  | 200 | 82,55        | 1                    | 200 | 80,38        |
| 1              | 300 | 291,44       | 1        | 300 | 32,37        | 1                  | 300 | 121,35       | 1                    | 300 | 118,62       |
| 1              | 400 | 393,26       | 1        | 400 | 42,78        | 1                  | 400 | 160,92       | 1                    | 400 | 159,54       |
| 1              | 500 | 487,86       | 1        | 500 | 53,27        | 1                  | 500 | 201,57       | 1                    | 500 | 198,79       |
| 1              | 600 | 588,50       | 1        | 600 | 63,76        | 1                  | 600 | 240,12       | 1                    | 600 | 238,22       |
| 1              | 700 | 688,32       | 1        | 700 | 74,48        | 1                  | 700 | 280,15       | 1                    | 700 | 277,78       |
| 1              | 800 | 753,63       | 1        | 800 | 82,23        | 1                  | 800 | 309,51       | 1                    | 800 | 305,85       |
| 2              | 10  | 9,18         | 2        | 10  | 1,19         | 2                  | 10  | 4,10         | 2                    | 10  | 4,03         |
| 2              | 100 | 94,91        | 2        | 100 | 10,54        | 2                  | 100 | 38,83        | 2                    | 100 | 38,04        |
| 2              | 200 | 196,33       | 2        | 200 | 21,90        | 2                  | 200 | 81,36        | 2                    | 200 | 79,60        |
| 2              | 300 | 291,71       | 2        | 300 | 32,97        | 2                  | 300 | 120,90       | 2                    | 300 | 118,41       |
| 2              | 400 | 391,56       | 2        | 400 | 43,53        | 2                  | 400 | 162,96       | 2                    | 400 | 159,77       |
| 2              | 500 | 485,37       | 2        | 500 | 53,32        | 2                  | 500 | 202,48       | 2                    | 500 | 198,13       |
| 2              | 600 | 585,79       | 2        | 600 | 64,62        | 2                  | 600 | 241,71       | 2                    | 600 | 234,17       |
| 2              | 700 | 683,63       | 2        | 700 | 74,59        | 2                  | 700 | 281,88       | 2                    | 700 | 276,71       |
| 2              | 800 | 745,35       | 2        | 800 | 81,42        | 2                  | 800 | 310,08       | 2                    | 800 | 303,14       |
| 3              | 10  | 9,41         | 3        | 10  | 1,19         | 3                  | 10  | 3,62         | 3                    | 10  | 3,46         |
| 3              | 100 | 93,75        | 3        | 100 | 10,34        | 3                  | 100 | 38,82        | 3                    | 100 | 38,81        |
| 3              | 200 | 198,79       | 3        | 200 | 21,95        | 3                  | 200 | 81,90        | 3                    | 200 | 80,32        |
| 3              | 300 | 290,62       | 3        | 300 | 31,87        | 3                  | 300 | 119,93       | 3                    | 300 | 118,45       |
| 3              | 400 | 388,49       | 3        | 400 | 42,53        | 3                  | 400 | 160,67       | 3                    | 400 | 158,15       |
| 3              | 500 | 485,77       | 3        | 500 | 54,14        | 3                  | 500 | 202,49       | 3                    | 500 | 196,21       |
| 3              | 600 | 583,60       | 3        | 600 | 63,26        | 3                  | 600 | 240,06       | 3                    | 600 | 234,87       |
| 3              | 700 | 688,13       | 3        | 700 | 75,26        | 3                  | 700 | 280,57       | 3                    | 700 | 279,20       |
| 3              | 800 | 750,05       | 3        | 800 | 81,57        | 3                  | 800 | 305,93       | 3                    | 800 | 304,60       |

Table S 1 Raw data calibration curves

| N  | Area Benzo[a]pyrene / mAU*s | Area Benzo[b]fluorene / mAU*s | Area Chrysene / mAU*s | Area Benz[a]anthracene / mAU*s |
|----|-----------------------------|-------------------------------|-----------------------|--------------------------------|
| 1  | 149,7                       | 135,1                         | 81,2                  | 205,4                          |
| 2  | 142,3                       | 131,3                         | 78,4                  | 200,1                          |
| 3  | 139,4                       | 128,3                         | 78,2                  | 192,6                          |
| 4  | 144                         | 134,9                         | 80                    | 194,2                          |
| 5  | 142,7                       | 130,9                         | 78,9                  | 186,8                          |
| 6  | 148,2                       | 137,2                         | 80,9                  | 198,8                          |
| 7  | 144,8                       | 134,5                         | 78,9                  | 199,9                          |
| 8  | 146,7                       | 135,1                         | 80,2                  | 203,1                          |
| 9  | 142,3                       | 131,9                         | 78,4                  | 196                            |
| 10 | 140,9                       | 129,8                         | 79,6                  | 198,6                          |
| 11 | 150,5                       | 137,9                         | 81,1                  | 199,1                          |
| 12 | 145,7                       | 135                           | 80,9                  | 197,3                          |
| 13 | 148,2                       | 137,2                         | 80,9                  | 198,8                          |
| 14 | 144,8                       | 134,5                         | 78,9                  | 193,9                          |
| 15 | 144                         | 134,9                         | 80                    | 190,2                          |

|    |       |       |      |       |
|----|-------|-------|------|-------|
| 16 | 142,7 | 130,9 | 78,9 | 186,8 |
| 17 | 139,3 | 130,6 | 77,7 | 179,1 |
| 18 | 140,1 | 129,9 | 77,9 | 176,9 |
| 19 | 148,8 | 137,2 | 81   | 196,1 |
| 20 | 145,4 | 133,8 | 80,2 | 192,2 |
| 21 | 142,3 | 131,3 | 78,4 | 196,1 |
| 22 | 139,4 | 128,3 | 78,2 | 192,6 |
| 23 | 138,2 | 129,2 | 78,5 | 186   |
| 24 | 136,7 | 127,1 | 77,1 | 182,2 |
| 25 | 144,6 | 134,3 | 79,3 | 199,2 |
| 26 | 142,7 | 131,6 | 79,3 | 194,5 |
| 27 | 144,4 | 133,9 | 78,8 | 198,5 |
| 28 | 142,2 | 132   | 78,8 | 197,3 |
| 29 | 143,4 | 133,2 | 79,4 | 197,9 |
| 30 | 143,7 | 133,3 | 78,7 | 194,9 |

*Table S 2 Raw data interday repeatability*
